# Supplementary material
Source: PubMed Central journal article supplement (PMC4794037)
Supplement: norp020807.w1_default.pdf [file norp020807.w1_default.pdf]

**Supplemental fig 1** The risk of death within 30 days of hospital discharge for patients with a length of stay of  $\leq 10$  days compared to patients with a length of stay of  $\geq 11$  days. Data are presented for the total cohort and according to subgroups. Odds ratios and 95% confidence intervals are presented. Patients that died during hospital stay were excluded.

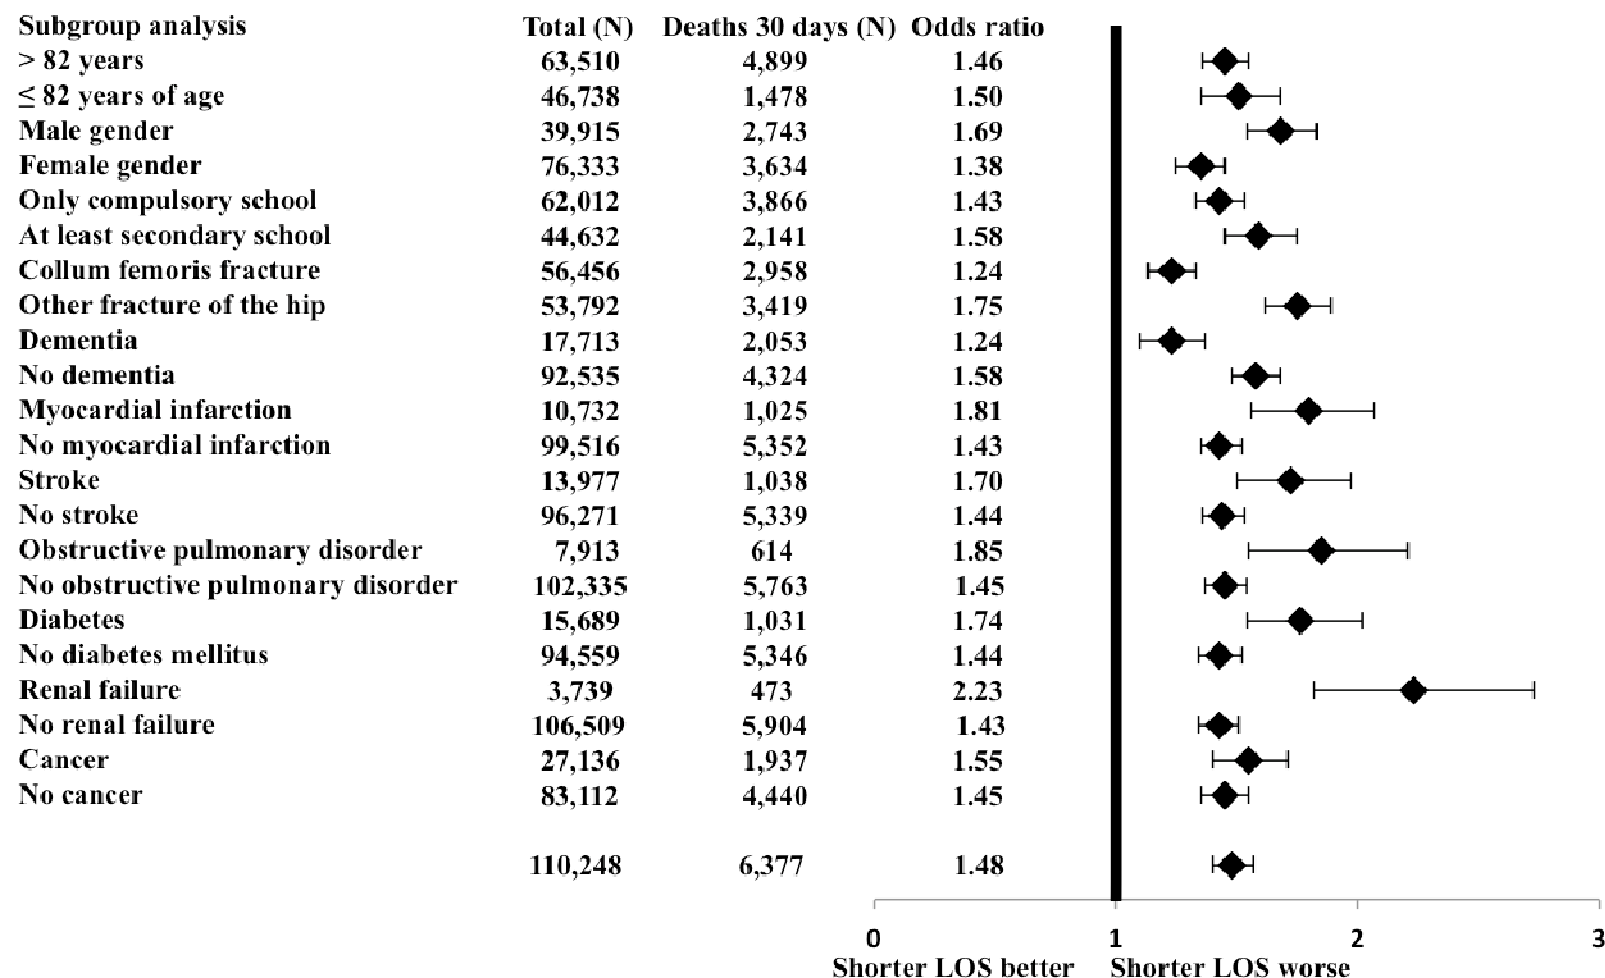

**Supplemental fig 2** The risk of death after hospital discharge for patients with a length of stay (LOS) of  $\leq 10$  days compared to patients with a length of stay of  $\geq 11$  days. Data are presented for the total cohort after excluding those that died during hospital stay.

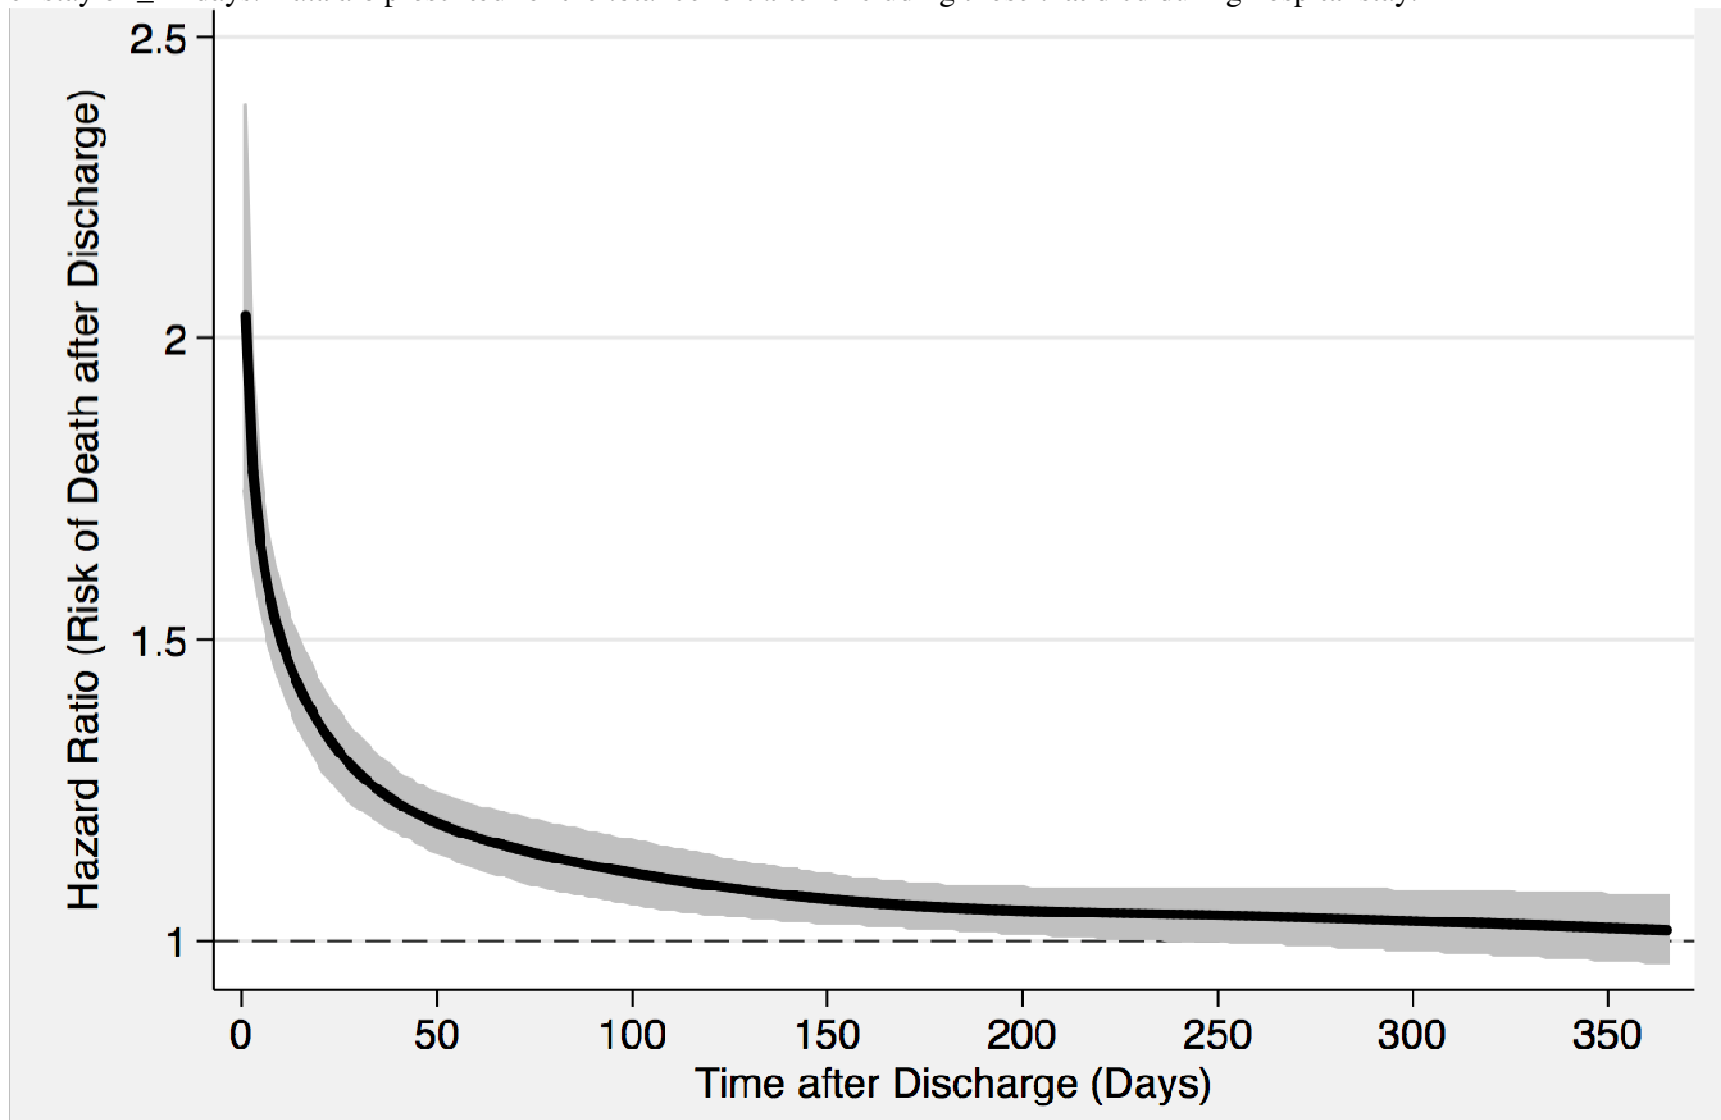

**Supplemental table** Risk of death between 11 and 30 days of admission to hospital for patients with a length of stay of  $\leq 10$  days. Data is presented separately for each year. Individuals who died before 11 days after hospital admission were excluded. Odds ratios (95% CI) are presented per 1-day decrease in length of stay

|                            | <b>Outcome: death within 11 to 30 days of admission</b> |                           |                           |                           |                           |                           |                           |
|----------------------------|---------------------------------------------------------|---------------------------|---------------------------|---------------------------|---------------------------|---------------------------|---------------------------|
|                            | <b>2006</b>                                             | <b>2007</b>               | <b>2008</b>               | <b>2009</b>               | <b>2010</b>               | <b>2011</b>               | <b>2012</b>               |
| Odds ratio (95% CI)        | 1.037<br>(0.987 to 1.090)                               | 1.041<br>(0.993 to 1.091) | 1.067<br>(1.016 to 1.121) | 1.085<br>(1.035 to 1.137) | 1.065<br>(1.015 to 1.118) | 1.067<br>(1.019 to 1.118) | 1.116<br>(1.067 to 1.166) |
| No of individuals at risk* | 8132                                                    | 7588                      | 7828                      | 7830                      | 7695                      | 7647                      | 7436                      |
| No (%) of deaths           | 334 (4.1)                                               | 375 (4.9)                 | 345 (4.4)                 | 374 (4.8)                 | 356 (4.6)                 | 335 (4.4)                 | 380 (5.1)                 |

\*Adjusted for all covariates
